# Supplementary material for: Facile loading of thin-film surface-anchored metal-organic frameworks with Lewis-base guest molecules
Source: Royal Society of Chemistry journal article supplement (doi:10.1039/c7qm00142h), 2017-01-01
Supplement: c7qm00142h1.pdf [file c7qm00142h1.pdf]

## Supporting Information

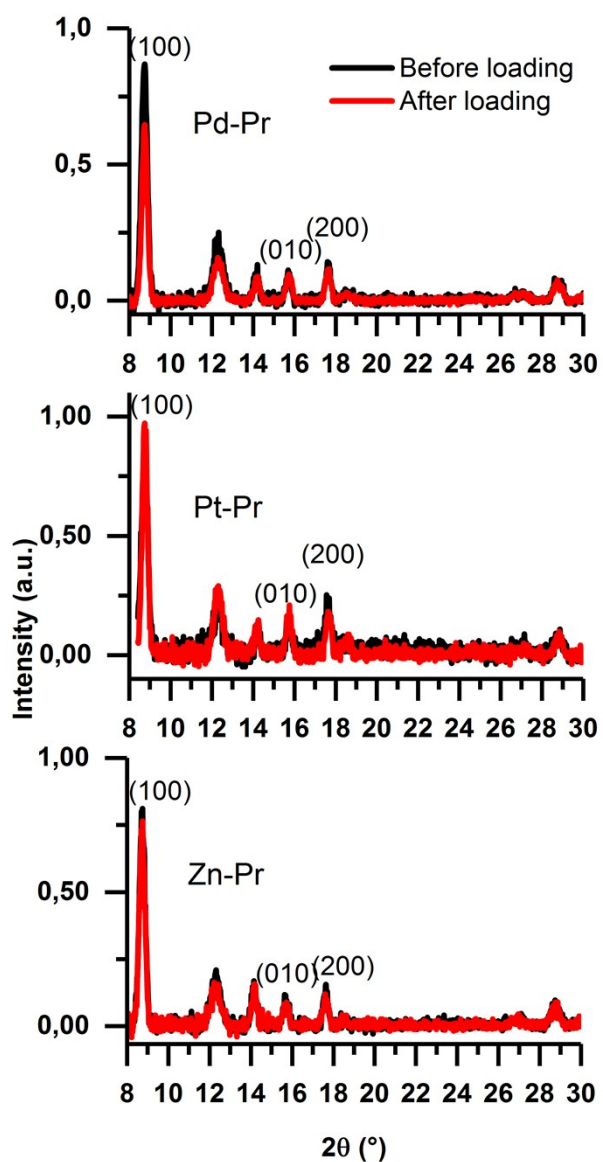

Figure S1: XRD in plane of ZnBDC SURMOF before and after the loading. The incorporation of the dyes molecules don't change the structure of the SURMOF.

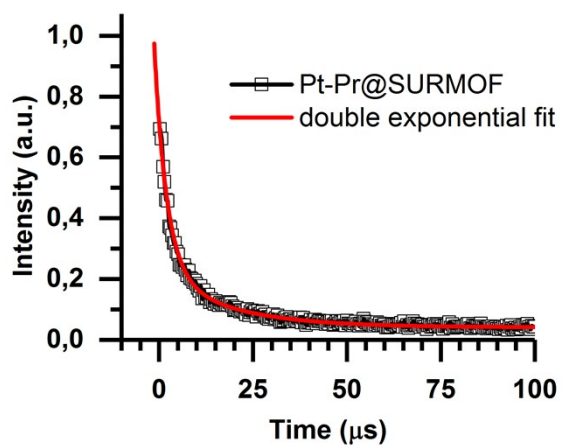

Figure S2. Time-resolved photoluminescence measurements of the Zn-BDC SURMOF loaded with carboxylic acid modified Pt porphyrin (Pt-Pr) excited at 410 nm under dynamic vacuum. Streak camera measurements of Pt-Pr@SURMOF shows a biexponential decay. This behaviour can be attribute to the presence of different kind of emitting species as the dye in different aggregate forms.
